# Supplementary material for: Phosphorylation of plastoglobular proteins in Arabidopsis thaliana
Source: PubMed Central journal article supplement (PMC4915526; doi:10.1093/jxb/erw091), 2016-03-09
Supplement: supp_erw091_supplementary_figure_S1.pdf [file supp_erw091_supplementary_figure_S1.pdf]

Query: AT4G04020.1 (size:318) - FBN1A  
 Target: AT4G22240.1 (size:310) - FBN1B  
 Query: 1 - 318 Target: 1 - 310 Evaluate: 1E-130

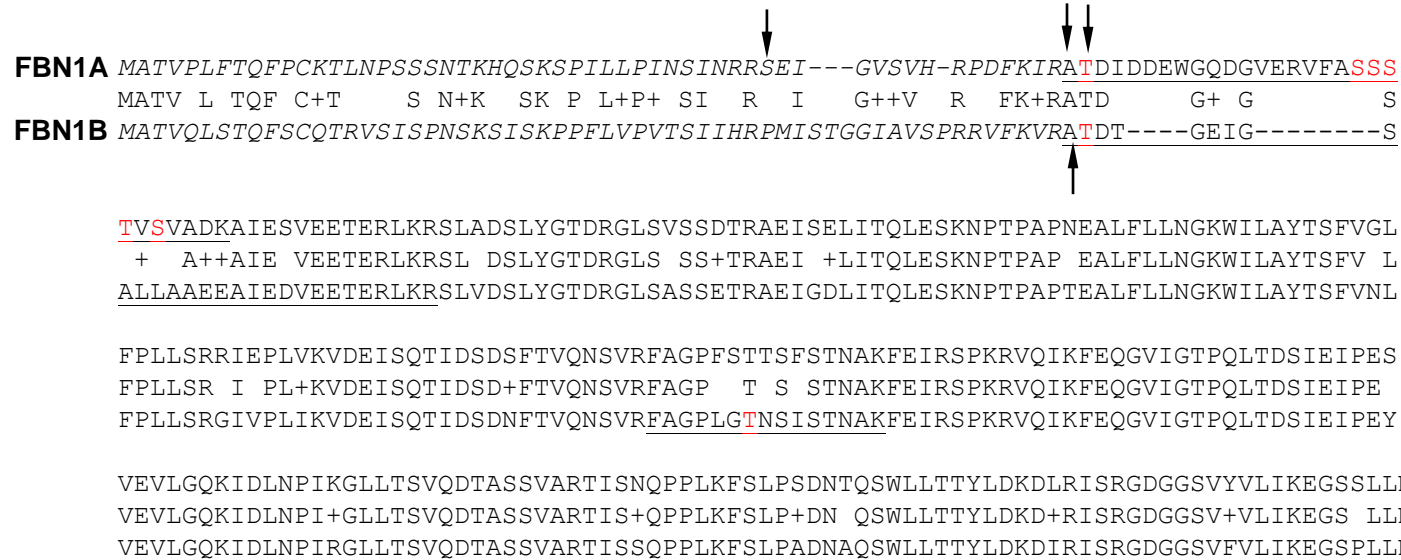

**Figure S1**

**Figure S1.** Sequence alignment of FBN1A and FBN1B, their p-peptides, p-sites and observed N-termini.
