# Supplementary material for: Phosphorylation of plastoglobular proteins in Arabidopsis thaliana
Source: PubMed Central journal article supplement (PMC4915526; doi:10.1093/jxb/erw091), 2016-03-09
Supplement: supp_erw091_supplementary_table_S1.pdf [file supp_erw091_supplementary_table_S1.pdf]

**Table S1.** PG-localized and related ABC1K and fibrillin proteins and their reported p-peptides.

| Gene id     | Protein name              | location (a) | reported in Table 1 (based on strength of evidence) | relative abundance in PG and/or leaf (b) | module in coexpression network (c)   | reported p-peptides (d)        | p-site residue number (e) | protein length and predicted/experimental N-terminal residue (f) | p-site within cTP (g) | Source data (h)                                                                      | Search engine used to identify reported p-peptide | Scores reported to identify reported p-peptide | Re-analysis with Mascot or/and manual evaluation of MS/MS spectrum                                                                                 | p-peptide confidence level following curation (i) | motif subtype (based on van Wijk et al 2014) |
|-------------|---------------------------|--------------|-----------------------------------------------------|------------------------------------------|--------------------------------------|--------------------------------|---------------------------|------------------------------------------------------------------|-----------------------|--------------------------------------------------------------------------------------|---------------------------------------------------|------------------------------------------------|----------------------------------------------------------------------------------------------------------------------------------------------------|---------------------------------------------------|----------------------------------------------|
| AT4G31390.1 | ABC1K1                    | core PG      |                                                     | 6                                        | II (ABC1K1,3,6)                      | LDLpTDPtIK                     | T604, T606                | 682; A80 (T54; S58; A62)                                         |                       | PhosPhat 4.0                                                                         | Mascot                                            | 17                                             | peptide not found                                                                                                                                  | 4; no                                             | TD                                           |
| AT1G79600.1 | ABC1K3                    | core PG      |                                                     | 7                                        | II (ABC1K1,3,6)                      | n.d.                           |                           | 711; A43                                                         |                       |                                                                                      |                                                   |                                                |                                                                                                                                                    |                                                   |                                              |
| AT1G71810.1 | ABC1K5                    | core PG      |                                                     | 18                                       | connected to II & III (ABC1K1,3,6,9) | n.d.                           |                           | 692; A40                                                         |                       |                                                                                      |                                                   |                                                |                                                                                                                                                    |                                                   |                                              |
| AT3G24190.1 | ABC1K6                    | core PG      |                                                     | 24                                       | II (ABC1K1,3,6)                      | n.d.                           |                           | 793; V20                                                         |                       |                                                                                      |                                                   |                                                |                                                                                                                                                    |                                                   |                                              |
| AT3G07700.1 | ABC1K7                    | core PG      |                                                     | 27                                       | I (ABC1K7)                           | AIGFpSSLENHFTGEATQCPpYGSKSK    | S26, Y41                  | 695; A73 (S67)                                                   | cTP                   | Wang X et al., 2013                                                                  | Sequest                                           | 3.308                                          | spectra not available; Generally, values $\geq 1.9$ for +1 ions, $\geq$ for +2 ions, and $\geq 3.75$ have been classified by others as significant | 2; maybe                                          | pSxS                                         |
| AT3G07700.1 | ABC1K7                    | core PG      |                                                     | 27                                       | I (ABC1K7)                           | LGQLSpSpTRpSDFPFR              | S212, T213, S215          | 695; A73 (S67)                                                   |                       | PhosPhat 4.0                                                                         | Mascot                                            | 18                                             | peptide not found                                                                                                                                  | 4; no                                             | xSDx                                         |
| AT3G07700.1 | ABC1K7                    | core PG      |                                                     | 27                                       | I (ABC1K7)                           | NLKLAIEpYFOK                   | Y310                      | 695; A73 (S67)                                                   |                       | PhosPhat 4.0                                                                         | Mascot                                            | 16                                             | peptide not found                                                                                                                                  | 4; no                                             | -                                            |
| AT5G05200.1 | ABC1K9                    | core PG      |                                                     | 5                                        | III (ABC1K9)                         | LFERMGATpYIK                   | Y140                      | 540; A45 (Q46)                                                   |                       | PhosPhat 4.0                                                                         | Mascot                                            | 16                                             | peptide not found                                                                                                                                  | 4; no                                             | -                                            |
| AT4G19170.1 | CCD4                      | core PG      |                                                     | 9                                        | II (ABC1K1,3,6)                      | YYpYAAIGDPMpK                  | Y481                      | 595; S35 (S42)                                                   |                       | PhosPhat 4.0                                                                         | Mascot                                            | 99                                             | peptide not found                                                                                                                                  | 4; no                                             | -                                            |
| AT1G54570.1 | DGAT3/PES1                | core PG      |                                                     | 11                                       | I (ABC1K7)                           | n.d.                           |                           | 704; A28                                                         |                       |                                                                                      |                                                   |                                                |                                                                                                                                                    |                                                   |                                              |
| AT3G26840.1 | DGAT4/PES2                | core PG      |                                                     | 23                                       | not in network                       | pYKIMGGVPVSHFNipYK             | Y498, Y512                | 701; A66 (V38)                                                   |                       | Engelsberger & Schulze 2012; PhosPhat 4.0                                            | Mascot                                            | 18-33                                          | peptide not found phosphorylated                                                                                                                   | 4; no                                             | -                                            |
| AT3G26840.1 | DGAT4/PES2                | core PG      |                                                     | 23                                       | not in network                       | MAVpTVLPpSpVpSGLSAVASSNLRR     | T4, S8, S10               | 701; V65 (S37)                                                   | cTP                   | PhosPhat 4.0                                                                         | Mascot                                            | 17                                             | peptide not found                                                                                                                                  | 4; no                                             | pSxS, SxpS, SG                               |
| AT3G26840.2 | DGAT4/PES2                | core PG      |                                                     | 23                                       | not in network                       | MAVTVLPpSVSGLSAVApSpSxNLRR     | S17, S18, S19             | 701; V65 (S37)                                                   | cTP                   | PhosPhat 4.0                                                                         | Mascot                                            | 20-21                                          | peptide not found                                                                                                                                  | 4; no                                             | pSxS, SxpS                                   |
| AT3G26840.3 | DGAT4/PES2                | core PG      |                                                     | 23                                       | not in network                       | MAVTVLPpSVSGLSAVApSpSxNLRR     | S18, S19                  | 701; V65 (S37)                                                   | cTP                   | PhosPhat 4.0                                                                         | Mascot                                            | 22                                             | peptide not found                                                                                                                                  | 4; no                                             | SxpS                                         |
| AT5G41120.1 | Esterase 1                | core PG      |                                                     | 30                                       | not in network                       | n.d.                           |                           | 684; P67 (V54)                                                   |                       |                                                                                      |                                                   |                                                |                                                                                                                                                    |                                                   |                                              |
| AT4G04020.1 | FBN1a                     | core PG      | x                                                   | 1                                        | not in network                       | VFApSpSpTVpSVADK               | S74, S75, S76, T77, S7    | 318; A56 (S41)                                                   |                       | Reiland et al., 2011                                                                 | Mascot                                            | 75-80                                          |                                                                                                                                                    | 1; yes                                            | SxpS, pSxS                                   |
| AT4G04020.1 | FBN1a                     | core PG      | x                                                   | 1                                        | not in network                       | ApTDIDDEWGDGQVVER              | T57                       | 318; A56 (S41)                                                   |                       | Roitinger et al., 2015; Wang et al., 2013; Reiland et al., 2011; Reiland et al. 2009 | Mascot; Sequest; Inspect                          | 68-102; 0.887; 2.634                           |                                                                                                                                                    | 1; yes                                            | TD                                           |
| AT4G22240.1 | FBN1b                     | core PG      | x                                                   | 3                                        | not in network                       | ApTDTGEGSALLAAEEAIEDVEETERLKR  | T61                       | 310; A60 (A60)                                                   |                       | Hoehenwarter et al., 2013                                                            | Mascot, Sequest                                   | 182, -                                         | confirmed pT61                                                                                                                                     | 1; yes                                            | TD                                           |
| AT4G22240.1 | FBN1b                     | core PG      | x                                                   | 3                                        | not in network                       | FAGPLGpTNSISTNAK               | T188                      | 310; A60 (A60)                                                   |                       | Roitinger et al., 2015                                                               | Mascot                                            | 45                                             | confirmed T188 - good spectrum                                                                                                                     | 1; yes                                            | -                                            |
| AT4G22240.1 | FBN1b                     | core PG      |                                                     | 3                                        | not in network                       | AEIGDLITOLEpSK                 | S120                      | 310; A60 (A60)                                                   |                       | Mithoe et al., 2012                                                                  | Mascot                                            |                                                | x                                                                                                                                                  | 3; weak evidence                                  | -                                            |
| AT2G35490.1 | FBN2                      | core PG      | x                                                   | 4                                        | III (ABC1K9)                         | pSGPELEESGTR                   | S105                      | 376; S54                                                         |                       | Roitinger et al., 2015; Nakagami et al., 2010; Sugiyama et al., 2008                 | Mascot                                            | 21-43                                          |                                                                                                                                                    | 1; yes                                            | SG, SxP                                      |
| AT2G35490.1 | FBN2                      | core PG      | x                                                   | 4                                        | III (ABC1K9)                         | SGPELEESGpTR                   | T114                      | 376; S54                                                         |                       | Roitinger et al., 2015                                                               | Mascot                                            | 50                                             | peptide not found                                                                                                                                  | 1; yes                                            | -                                            |
| AT3G23400.1 | FBN4                      | core PG      |                                                     | 2                                        | III (ABC1K9)                         | pYpSFSLTPK                     | Y30, S31                  | 284; S73 (A54)                                                   | cTP                   | Engelsberger & Schulze 2012; PhosPhat 4.0                                            | Mascot                                            | 15-24                                          | peptide not found                                                                                                                                  | 4; no                                             | pSxS                                         |
| AT3G23400.1 | FBN4                      | core PG      | x                                                   | 2                                        | III (ABC1K9)                         | LLSVpSGLNR                     | S96                       | 284; S73 (A54)                                                   |                       | Roitinger et al., 2015                                                               | Mascot                                            | 45                                             |                                                                                                                                                    | 1; yes                                            | SG                                           |
| AT3G23400.1 | FBN4                      | core PG      | x                                                   | 2                                        | III (ABC1K9)                         | GLVApSVDDLDER                  | S105                      | 284; S73 (A54)                                                   |                       | Reiland et al., 2011; Reiland et al., 2009                                           | Inspect; Mascot                                   | 1.79/2.178; 46/70                              | confirmed S105; excellent coverage                                                                                                                 | 1; yes                                            | -                                            |
| AT3G23400.1 | FBN4                      | core PG      | x                                                   | 2                                        | III (ABC1K9)                         | LLYSSAFpSSR                    | S148                      | 284; S73 (A54)                                                   |                       | Roitinger et al., 2015                                                               | Mascot                                            | 44                                             | confirmed coverage for pS148                                                                                                                       | 1; yes                                            | -                                            |
| AT3G23400.1 | FBN4                      | core PG      | x                                                   | 2                                        | III (ABC1K9)                         | pSLGGSRPGLPTGR                 | S151                      | 284; S73 (A54)                                                   |                       | Roitinger et al., 2015                                                               | Mascot                                            | 24-37                                          | confirmed pS151                                                                                                                                    | 1; yes                                            |                                              |
| AT3G23400.1 | FBN4                      | core PG      | x                                                   | 2                                        | III (ABC1K9)                         | SLGGpSRPGLPTGR                 | S155                      | 284; S73 (A54)                                                   |                       | Roitinger et al., 2015                                                               | Mascot                                            | 24-37                                          | confirmed pS155                                                                                                                                    | 1; yes                                            | GS                                           |
| AT3G58010.1 | FBN7a                     | core PG      |                                                     | 8                                        | III (ABC1K9)                         | n.d.                           |                           | 308; A54                                                         |                       |                                                                                      |                                                   |                                                |                                                                                                                                                    |                                                   |                                              |
| AT2G42130.4 | FBN7b                     | core PG      | x                                                   | 13                                       | IV                                   | IETPSSTVVETIEYDpS              | S299                      | 299; A49                                                         | C-terminus            | Xue et al., 2013                                                                     | Sequest                                           | 3.98                                           | spectra not available; from Suppl data: pS299 has highest probability                                                                              | 1; yes                                            | DS                                           |
| AT2G46910.1 | FBN8                      | core PG      |                                                     | 17                                       | connected to ABC1K5, II, IV          | n.d.                           |                           | 284; V41                                                         |                       |                                                                                      |                                                   |                                                |                                                                                                                                                    |                                                   |                                              |
| AT1G32220.1 | Flavin reductase related1 | core PG      | x                                                   | 14                                       | connected to UbiE1                   | SCVKCTYAEAGLpSSASWpSAPIDIVADVK | S46, S51                  | 296; A58 (T39)                                                   |                       | Wang X et al., 2013                                                                  | Sequest                                           | 4.937                                          | spectra not available; reported Ascore highest for S51 (11.23) and 4.31 for S46                                                                    | 1; yes high score                                 | SxP, SxpS                                    |
| AT1G32220.1 | Flavin reductase related1 | core PG      | x                                                   | 14                                       | connected to UbiE1                   | SCVKCTYAEAGLpSSASWpSAPIDIVADVK | S47, S51                  | 296; A58 (T39)                                                   |                       | Wang X et al., 2013                                                                  | Sequest                                           | 3.16                                           | spectra not available; reported Ascore highest for S51 (10.18) and 2.47 for S47                                                                    | 1; yes high score                                 | SxP, SxpS, pSxS                              |
| AT1G32220.1 | Flavin reductase related1 | core PG      |                                                     | 14                                       | connected to UbiE1                   | pSCVKCTYAEAGLSSASWpSAPIDIVADVK | S34, S51                  | 296; A58 (T39)                                                   | cTP                   | Wang X et al., 2013                                                                  | Sequest                                           | 0.60383                                        | spectra not available                                                                                                                              | 4; no low score                                   | SxP, SxpS                                    |
| AT1G32220.1 | Flavin reductase related1 | core PG      |                                                     | 14                                       | connected to UbiE2                   | pSCVKCTYAEAGLSSASWpSAPIDIVADVK |                           | 296; A58 (T39)                                                   | cTP                   | Wang X et al., 2013                                                                  | Sequest                                           |                                                | spectra not available                                                                                                                              | 4; no low score                                   |                                              |

|             |                                    |                          |     |    |                          |                                  |                    |                     |                                 |                       |                      |                                                                                                 |                                                                           |                      |                |
|-------------|------------------------------------|--------------------------|-----|----|--------------------------|----------------------------------|--------------------|---------------------|---------------------------------|-----------------------|----------------------|-------------------------------------------------------------------------------------------------|---------------------------------------------------------------------------|----------------------|----------------|
| AT2G34460.1 | Flavin reductase related 2 ?       | core PG                  | x   | 21 | II (ABC1K1,3,6)          | pSYKDLFASVK                      | S269               | 280; A52 (M35)      | Roitinger et al., 2015          | Mascot                | 34                   | support for S269, but fragment ions are low intensity                                           | 1; yes                                                                    | SxxD/E               |                |
| AT2G34460.1 | Flavin reductase related 2 ?       | core PG                  |     | 21 | II (ABC1K1,3,6)          | YKIMGGVPSVSHFNIVK                |                    | 280; A52 (M35)      | Engelsberger & Schulze 2011; Ph | Mascot                | 18-33                | this peptide is not found in this protein. The experimental m/z matched to a different peptide. | 4; no                                                                     |                      |                |
| AT3G27110.1 | M48 protease                       | core PG                  |     | 29 | I (ABC1K7)               | n.d.                             |                    | 344; A48            |                                 |                       |                      |                                                                                                 |                                                                           |                      |                |
| AT1G06690.1 | NAD(P)-Aldoketo reductase          | core PG                  | (x) | 20 | II (ABC1K1,3,6)          | LGGpSLKVTK                       | S54                | 377; A32 (A32, V33) | Engelsberger & Schulze 2012     | Mascot                | 17 with neutral loss | peptide with neutral loss (score 21)                                                            | 2; probably yes, but weak evidence                                        | GS, xSDx             |                |
| AT1G06690.1 | NAD(P)-Aldoketo reductase          | core PG                  |     | 20 | II (ABC1K1,3,6)          | AVGVSNypSEK                      | S211               | 377; A32            | Engelsberger & Schulze 2012     | Mascot                | 15-24                | No hit for AVGVSNYSEK with P but 5 matches for K.AVENSPFLEKL with mascot score 49-R5            | 4; no                                                                     | SE                   |                |
| AT5G08740.1 | NDC1                               | core PG                  |     | 12 | II (ABC1K1,3,6)          | n.d.                             |                    | 519; A53 (A2)       |                                 |                       |                      |                                                                                                 |                                                                           |                      |                |
| AT4G39730.1 | PLAT/LH2-1                         | core PG                  |     | 25 | connected to II (ABC1K6) | n.d.                             |                    | 181; A19            |                                 |                       |                      |                                                                                                 |                                                                           |                      |                |
| AT3G10130.1 | Soul heme-binding protein          | core PG                  |     | 16 | not in network           | n.d.                             |                    | 309; A71 (R50)      |                                 |                       |                      |                                                                                                 |                                                                           |                      |                |
| AT1G78140.1 | UbiE methyltransferase-related 1   | core PG                  |     | 19 | connected to FRR1        | n.d.                             |                    | 355; S41            |                                 |                       |                      |                                                                                                 |                                                                           |                      |                |
| AT2G1040.1  | UbiE methyltransferase-related 2 ? | core PG                  |     | 22 | II (ABC1K1,3,6)          | pSRFPsAAIpSAVAPK                 | S47, S55           | 352; A56 (A53)      | cTP                             | PhosPhat 4.0          | Mascot               | 16-19                                                                                           | peptide not found                                                         | 4; no                | -              |
| AT4G13200.1 | unknown 1                          | core PG                  | x   | 15 | III (ABC1K9)             | TIMVDVEESSpSDED                  | S182               | 185; C57            | Roitinger et al., 2015          | Mascot                | 91                   | spectra not available; but high p-RS site score (99)                                            | 1; yes                                                                    | SDx[D/E]             |                |
| AT4G13200.1 | unknown 1                          | core PG                  |     | 15 | III (ABC1K9)             | TIMVDVEEpSpSSSDED                | S178, S179         | 185; C57            | Wang P et al., 2013             | Sequest               | -                    | 4. no; no spectral data available; no                                                           |                                                                           | SxpS, pSxS           |                |
| AT4G13200.1 | unknown 1                          | core PG                  |     | 15 | III (ABC1K9)             | TIMVDVEEpSpSSSDED                | S178, S180         | 185; C57            | Wang P et al., 2013             | Sequest               | -                    | 4. no; no spectral data available; no                                                           |                                                                           | SxpS, pSxS           |                |
| AT4G13200.1 | unknown 1                          | core PG                  |     | 15 | III (ABC1K9)             | TIMVDVEEpSpSSpSDED               | S178, S181         | 185; C57            | Wang P et al., 2013             | Sequest               | -                    | 4. no; no spectral data available; no                                                           |                                                                           | SxpS, pSxS           |                |
| AT4G13200.1 | unknown 1                          | core PG                  |     | 15 | III (ABC1K9)             | TIMVDVEEpSSSpSDED                | S178, S182         | 185; C57            | Wang P et al., 2013             | Sequest               | -                    | 4. no; no spectral data available; no                                                           |                                                                           | SxpS, pSxS, SDx[D/E] |                |
| AT4G13200.1 | unknown 1                          | core PG                  |     | 15 | III (ABC1K9)             | TIMVDVEEpSpSSSDED                | S179, S180         | 185; C57            | Wang P et al., 2013             | Sequest               | -                    | 4. no; no spectral data available; no                                                           |                                                                           | SxpS, pSxS           |                |
| AT4G13200.1 | unknown 1                          | core PG                  |     | 15 | III (ABC1K9)             | TIMVDVEEpSpSpSDED                | S179, S181         | 185; C57            | Wang P et al., 2013             | Sequest               | -                    | 4. no; no spectral data available; no                                                           |                                                                           | SxpS, pSxS, SDx[D/E] |                |
| AT4G13200.1 | unknown 1                          | core PG                  |     | 15 | III (ABC1K9)             | TIMVDVEEpSSSpSDED                | S179, S182         | 185; C57            | Wang P et al., 2013             | Sequest               | -                    | 4. no; no spectral data available; no                                                           |                                                                           | SxpS, pSxS, SDx[D/E] |                |
| AT3G43540.1 | unknown 2 (DUF1350)                | core PG                  |     | 26 | IV                       | n.d.                             |                    | 373; T33            |                                 |                       |                      |                                                                                                 |                                                                           |                      |                |
| AT1G73750.1 | unknown SAG                        | core PG                  |     | 28 | I (ABC1K7)               | n.d.                             |                    | 452; R50 (V38)      |                                 |                       |                      |                                                                                                 |                                                                           |                      |                |
| AT4G32770.1 | VTE1                               | core PG                  | (x) | 10 | not connected            | SISRvVpSApSlpSpTPNSETDK          | S47, S49, S51, T52 | 488; V99 (S49)      | (cTP)                           | Nakagami et al., 2010 | Mascot               | 21                                                                                              | S51 and T52 are ambiguous; but S47 and S49 confirmed in Suppl Information | 1; yes               | pSxS, SxpS, TP |
| AT3G25760.1 | AOC1                               | recruited to PG          |     |    | not in network           | n.d.                             |                    | 254; P79 (A66)      |                                 |                       |                      |                                                                                                 |                                                                           |                      |                |
| AT3G25770.1 | AOC2                               | recruited to PG          |     |    | not in network           | HpSPKILK                         | S97                | 254; P79 (A66)      | Wu et al., 2013                 | Maxquant              | -                    | peptide not found                                                                               | 4; no                                                                     | SP                   |                |
| AT5G42650.1 | AOS                                | recruited to PG          | x   |    | not in network           | ASGpSETPDLTVATR                  | S36                | 518; A33 (S34)      | Reiland et al., 2009            | Inspect               | 1,422                | no spectral data available                                                                      | 1; yes; high score                                                        | SxpS, GS             |                |
| AT5G42650.1 | AOS                                | recruited to PG          | x   |    | not in network           | ApSGSETPDLTVATR                  | S34                | 518; A33 (S34)      | Reiland et al., 2009            | Inspect               | 0.945                | no spectral data available                                                                      | 1; yes high score                                                         | pSxS, SG             |                |
| AT5G42650.1 | AOS                                | recruited to PG          |     |    | not in network           | TGpSK*DLPIR                      | S49                | 518; A33 (S34)      | Roitinger et al., 2015          | Mascot                | 25                   | no spectral data available                                                                      | no spectral data available                                                | GS                   |                |
| AT3G45140.1 | LOX2                               | recruited to PG          | (x) |    | not in network           | EFYEpSPEK*                       | S787               | 896; R56 (C50)      | Roitinger et al., 2015          | Mascot                | 34                   | no spectra available                                                                            | 2; weak score                                                             | SP                   |                |
| AT3G45140.1 | LOX2                               | recruited to PG          |     |    | not in network           | ELNNTLYApSR                      | S488               | 896; R56 (C50)      | Wu et al., 2013                 | Maxquant              | -                    | very ambiguous; score 21                                                                        | 3; unlikely                                                               | -                    |                |
| AT1G17420.1 | LOX3                               | recruited to PG          |     |    | not in network           | n.d.                             |                    | 919; A53 (S49)      |                                 |                       |                      |                                                                                                 |                                                                           |                      |                |
| AT1G72520.1 | LOX4                               | recruited to PG          |     |    | not in network           | n.d.                             |                    | 926; A59 (S55)      |                                 |                       |                      |                                                                                                 |                                                                           |                      |                |
| AT5G13800.1 | PPH                                | recruited to PG          |     |    | I (ABC1K7)               | GIWKHLpSGGFALPLLEDpTEEDWEESRIG R | S416, T428         | 484; S47            | Wang P et al., 2013             | Sequest               | -                    |                                                                                                 | no spectral data available                                                | SG                   |                |
| AT5G24970.1 | ABC1K2                             | plastid                  |     |    | not in network           | n.d.                             |                    | 719; V60            |                                 |                       |                      |                                                                                                 |                                                                           |                      |                |
| AT2G39190.2 | ABC1K4                             | plastid                  |     |    | not in network           | RAIPPVpSVGLGHFADVVR              | S40                | 814; A25            | PhosPhat 4.0                    | Mascot                | 19-99                | only spectrum for low scoring spectrum                                                          | 4; no                                                                     | SxG                  |                |
| AT5G64940.1 | ABC1K8                             | plastid (IE or Nucleoid) |     |    | not in network           | QVEVpSVTPGGR                     | S160               | 761; S29            | Engelsberger & Schulze 2012     | Mascot                | 16                   | peptide not found                                                                               | 4; no                                                                     | -                    |                |
| AT1G51110.1 | FBN10                              | Thylakoid                |     |    | not in network           | n.d.                             |                    | 409; C56            |                                 |                       |                      |                                                                                                 |                                                                           |                      |                |
| AT5G53450.1 | FBN11/ORG1                         | plastid                  |     |    | not in network           | LNpTTRAOR                        | T130               | 686; S53            | PhosPhat 4.0                    | Mascot                | 17                   | peptide not found                                                                               | 4; no                                                                     | -                    |                |
| AT3G26070.1 | FBN3a                              | Thylakoid                | x   |    | not in network           | GATApSPDDQLR                     | S92                | 242; V51            | Roitinger et al., 2015          | Mascot                | 68                   | no spectra but good score reported                                                              | 1; yes                                                                    | SP                   |                |
| AT3G26080.1 | FBN3b                              | Thylakoid                |     |    | not in network           | n.d.                             |                    | 234; I46            |                                 |                       |                      |                                                                                                 |                                                                           |                      |                |

|             |           |              |                |                  |        |          |     |                             |        |       |                                        |                  |    |
|-------------|-----------|--------------|----------------|------------------|--------|----------|-----|-----------------------------|--------|-------|----------------------------------------|------------------|----|
| AT5G09820.2 | FBN5      | Stroma       | not in network | TSNLFQPPpSMAASR  | S10    | 296; C62 | cTP | PhosPhat 4.0                | Mascot | 20    | 18                                     | 3; weak evidence | -  |
| AT5G19940.1 | FBN6      | Thylakoid    | not in network | n.d.             |        | 239; V51 |     |                             |        |       |                                        |                  |    |
| AT4G00030.1 | FBN9      | plastid (x)  | not in network | SSITDDSLSApTWR   | T87    | 212; C26 |     | Mithoe et al., 2012         | Mascot | 20    | weak spectral coverage (only 2 b-ions) | 2; possible      | -  |
| AT1G11390.1 | ABC1K10-a | mitochondria | not in network | n.d.             |        | 624      |     |                             |        |       |                                        |                  |    |
| AT1G61640.1 | ABC1K10-b | mitochondria | not in network | n.d.             |        | 621      |     |                             |        |       |                                        |                  |    |
| AT5G24810.1 | ABC1K11   | mitochondria | not in network | n.d.             |        | 1009     |     |                             |        |       |                                        |                  |    |
| AT4G24810.2 | ABC1K12-a | mitochondria | not in network | n.d.             |        | 481      |     |                             |        |       |                                        |                  |    |
| AT5G50330.1 | ABC1K12-b | mitochondria | not in network | n.d.             |        | 479      |     |                             |        |       |                                        |                  |    |
| AT4G01660.1 | ABC1K13   | mitochondria | not in network | pSFpTRLVNGVSLVAK | S7, T9 | 623; L11 | mTP | Engelsberger & Schulze 2012 | Mascot | 17-23 | peptide not found                      | 4; no            | -  |
| AT1G65950.1 | ABC1K14   | mitochondria | not in network | IATAVEGVVRpSSR   | S59    | 551; A71 |     | Engelsberger & Schulze 2012 | Mascot | 17-99 | not found or very weak                 | 3; unlikely      | RS |
| AT2G40090.1 | ABC1K15   | mitochondria | not in network | n.d.             |        | 538      |     |                             |        |       |                                        |                  |    |

(a) Curated location based on all available information. P-plastid, M-mitochondria, C-cytosol, PG - plastoglobule; IE - chloroplast inner envelope membrane

(b) Relative abundance of PG proteins based on label free spectral counting from Lundquist et al 2012.

(c) Assignment to mRNA based co-expression modules as published in Lundquist et al 2012. Co-expression module I contains ABC1K7, module II contains ABC1K1,3,6, module III contains ABC1K9, module IV has no kinases. ABC1K5 connects to both module II and III

(d) reported p-peptides in databases or publications.

(e) p-site residue number

(f) protein length and predicted or experimental N-terminus

(g) p-site within cTP

(h) Source of the reported peptide

(i) Confidence levels based on all available data and manual inspection: 1- probably true; 2-some evidence; 3 - weak evidence; 4 - not identified upon search of original data; 5 - no spectral data available
